# Supplementary material for: Effect of phase composition, morphology, and specific surface area on the photocatalytic activity of TiO2 nanomaterials
Source: Royal Society of Chemistry journal article supplement (doi:10.1039/c4ra05509h), 2014-01-01
Supplement: c4ra05509h1.pdf [file c4ra05509h1.pdf]

## **Supplementary Information for:**

### **Effect of phase composition, morphology, and specific surface area on the photocatalytic activity of TiO<sub>2</sub> nanomaterials**

Hao Cheng<sup>b</sup>, Jingyu Wang<sup>a,b\*</sup>, Yizhi Zhao<sup>b</sup>, Xijiang Han<sup>b,\*</sup>

*<sup>a</sup> School of Chemistry and Chemical Engineering, Huazhong University of Science and Technology, 1037 Luoyu Road, Wuhan 430074, China.*

*<sup>b</sup> Department of Chemistry, Harbin Institute of Technology, 92 West Dazhi Street, Harbin 150001, China.*

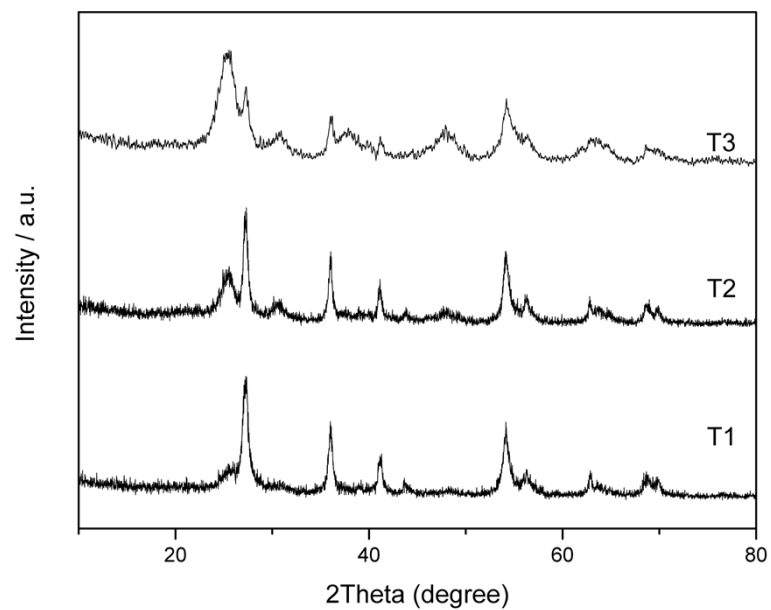

**Figure S1** XRD patterns of samples obtained from different volume of 1 M  $\text{HNO}_3$  without NaOH treatment. The volume of  $\text{HNO}_3$  was 60 mL, 110 mL, and 180 mL from T1 to T3.

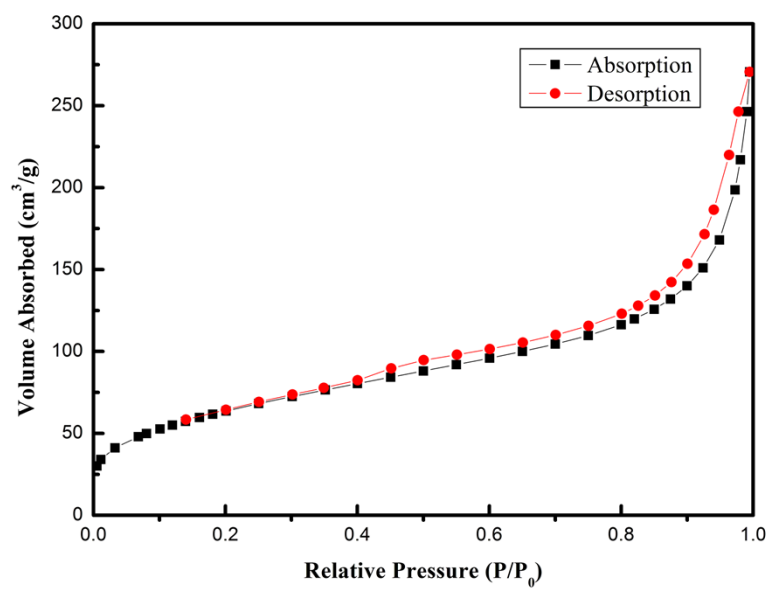

**Figure S2** Nitrogen adsorption-desorption isotherms of sample T3.

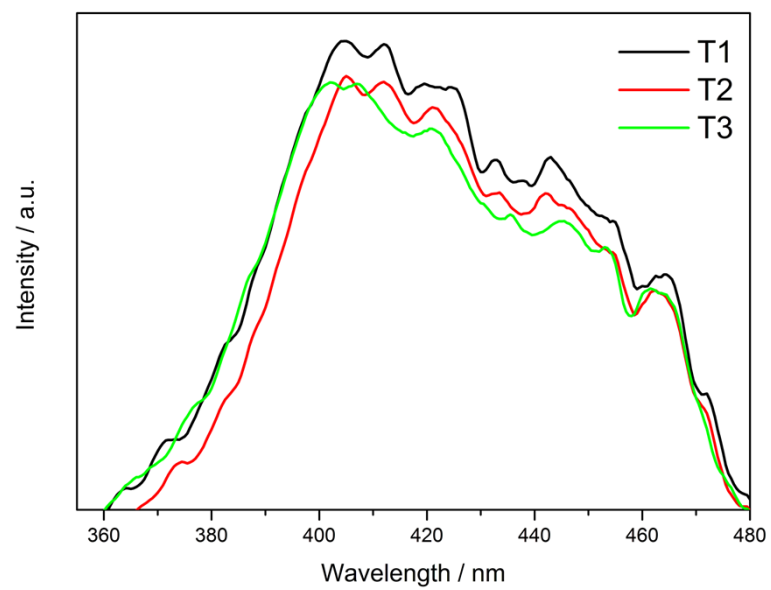

**Figure S3** PL spectra of T-series samples, from T1 to T3.
